# Supplementary material
Source: ML conference proceedings conference paper supplement (https://openreview.net/forum?id=7NqRDbkizw)
Supplement: supplementary_material [file attachment]

# DIA: DIFFUSION BASED INVERSE NETWORK ATTACK ON COLLABORATIVE INFERENCE

Anonymous authors

Paper under double-blind review

## A APPENDIX

### A.1 MORE RANDOM EXAMPLES OF RECONSTRUCTED INPUTS FROM DIA

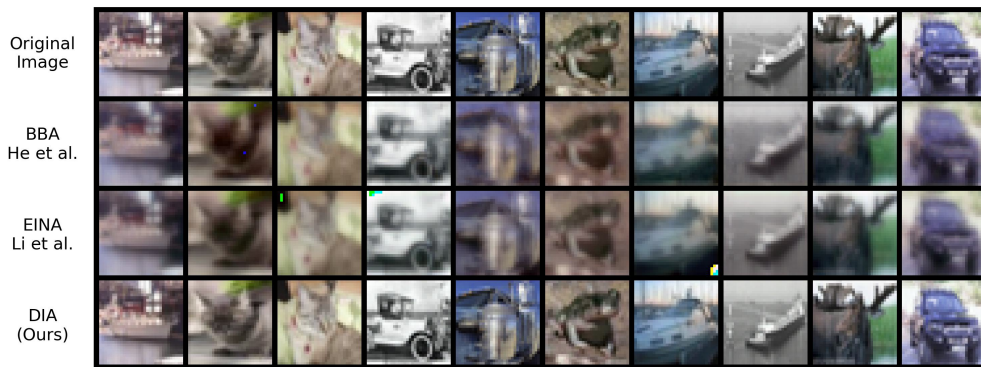

Figure 1: Reconstructed inputs comparison of prior approaches and our method on Layer1 of ResNet

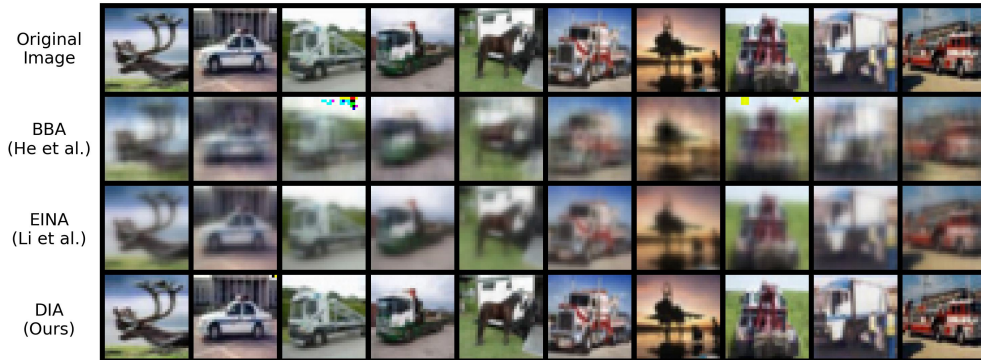

Figure 2: Reconstructed inputs comparison of prior approaches and our method on Block3 of ViT
